# Supplementary material for: Fabricated Gamma-Alumina-Supported Zinc Ferrite Catalyst for Solvent-Free Aerobic Oxidation of Cyclic Ethers to Lactones
Source: Molecules. 2023 Oct 20;28(20):7192. doi: 10.3390/molecules28207192 (PMC10609177; doi:10.3390/molecules28207192)
Supplement: Supplementary file 1 [file molecules-28-07192-s001.zip › molecules-2655754-supplementary.pdf]

# Fabricated Gamma Alumina-Supported Zinc Ferrite Catalyst for Solvent-Free Aerobic Oxidation of Cyclic Ethers to Lactones

Naaser A. Y. Abduh <sup>1,\*</sup>, Abdullah A. Al-Kahtani <sup>1</sup>, Mabrook S. Amer <sup>1</sup>, Tahani Saad Algarni <sup>1</sup>, and Abdel-Basit Al-Odayni <sup>2,\*</sup>

Supplementary:

**Table S1.** Comparison of various catalyst-support mole ratio performances in terms of conversion and selectivity. Condition: PO<sub>2</sub> = 3.5 bar, substrate (THF) = 10 mL, 0.5 g catalyst, 85°C, 12 h.

| Catalyst-support mole ratio | Conversion (%) | Selectivity of GBL (%) |
|-----------------------------|----------------|------------------------|
| 1:1                         | 29.6           | 74.4                   |
| 1:2                         | 48.1           | 83.9                   |
| 1:3                         | 45.3           | 58                     |

**Table S2.** Products of cyclic ethers oxidation reaction

| Entry | substrate                                                                           | Product                                                                             | By-products                                                                         |                                                                                     |                                                                                       |                    |
|-------|-------------------------------------------------------------------------------------|-------------------------------------------------------------------------------------|-------------------------------------------------------------------------------------|-------------------------------------------------------------------------------------|---------------------------------------------------------------------------------------|--------------------|
| 1     | 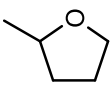   | 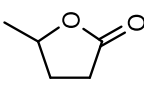   | 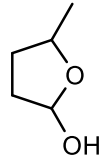   | 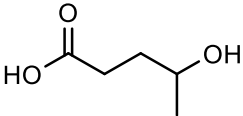   | 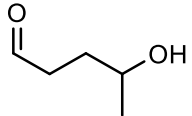   |                    |
| 2     | 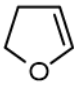   | 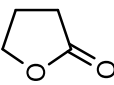   | 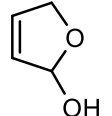   | 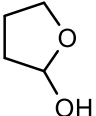   | 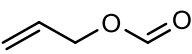   | Polymeric products |
| 3     | 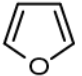   | -                                                                                   |                                                                                     |                                                                                     |                                                                                       | Polymeric products |
| 4     | 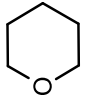   | 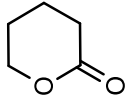   | 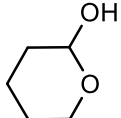   | 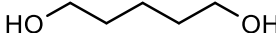  | 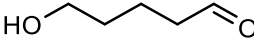   |                    |
| 5     | 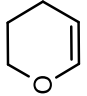  | 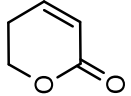  | 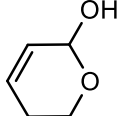  | 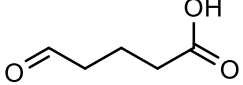   | 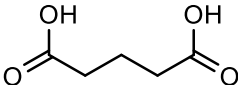  | Polymeric products |
| 6     | 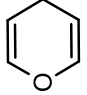 | 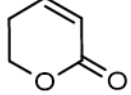 | 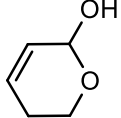 | 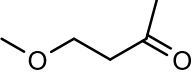 |                                                                                       | Polymeric products |
| 7     | 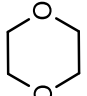 | 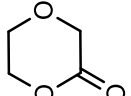 | 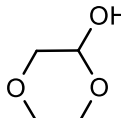 | 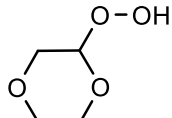 | 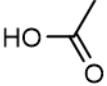 |                    |
